# Supplementary material for: Sonochemical preparation of a ytterbium oxide/reduced graphene oxide nanocomposite for supercapacitors with enhanced capacitive performance
Source: Royal Society of Chemistry journal article supplement (doi:10.1039/c6ra02943d), 2016-01-01
Supplement: c6ra02943d1.pdf [file c6ra02943d1.pdf]

Supplementary information

**Sonochemical preparation of Ytterbium oxide/Reduced Graphene Oxide nanocomposite for supercapacitor with enhanced capacitive performance**

Hamid Reza Naderi,<sup>a</sup> Mohammad Reza Ganjali,<sup>\*ab</sup> Amin Shiralizadeh Dezfuli<sup>a</sup> and Parviz Norouzi<sup>ab</sup>,

<sup>a</sup> Center of Excellence in Electrochemistry, Faculty of Chemistry, University of Tehran, Tehran, Iran.

<sup>b</sup> Biosensor Research Center, Endocrinology & Metabolism Molecular-Cellular Sciences Institute, Tehran University of Medical Sciences, Tehran, Iran.

Corresponding Author

Prof. Mohammad Reza Ganjali

E-mail: ganjali@khayam.ut.ac.ir

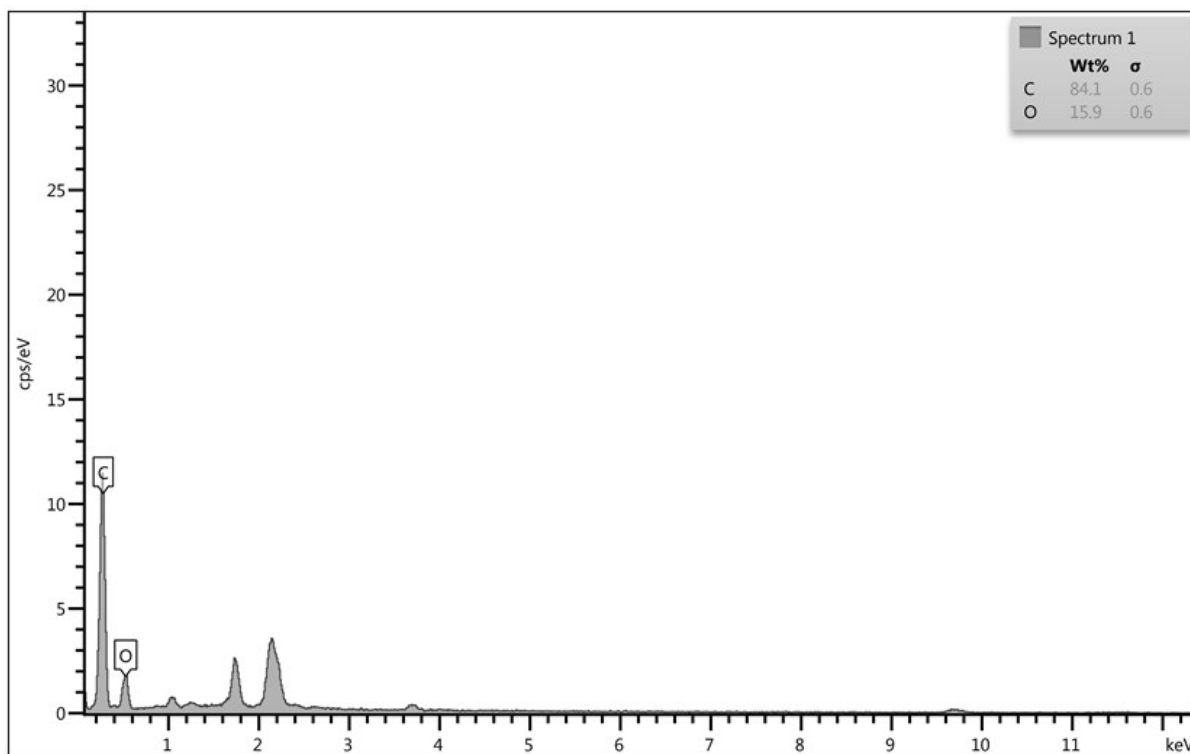

Fig. S1 EDX analysis of RGO.

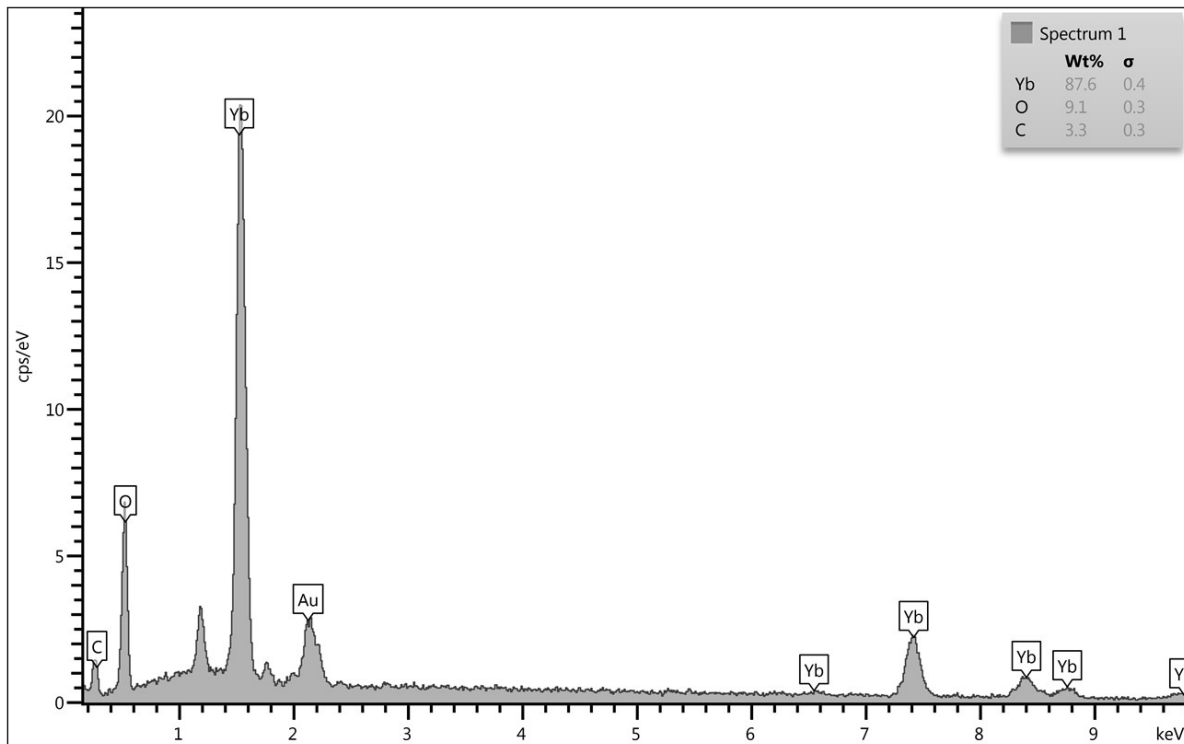

Fig. S2 EDX analysis of  $\text{Yb}_2\text{O}_3$ .

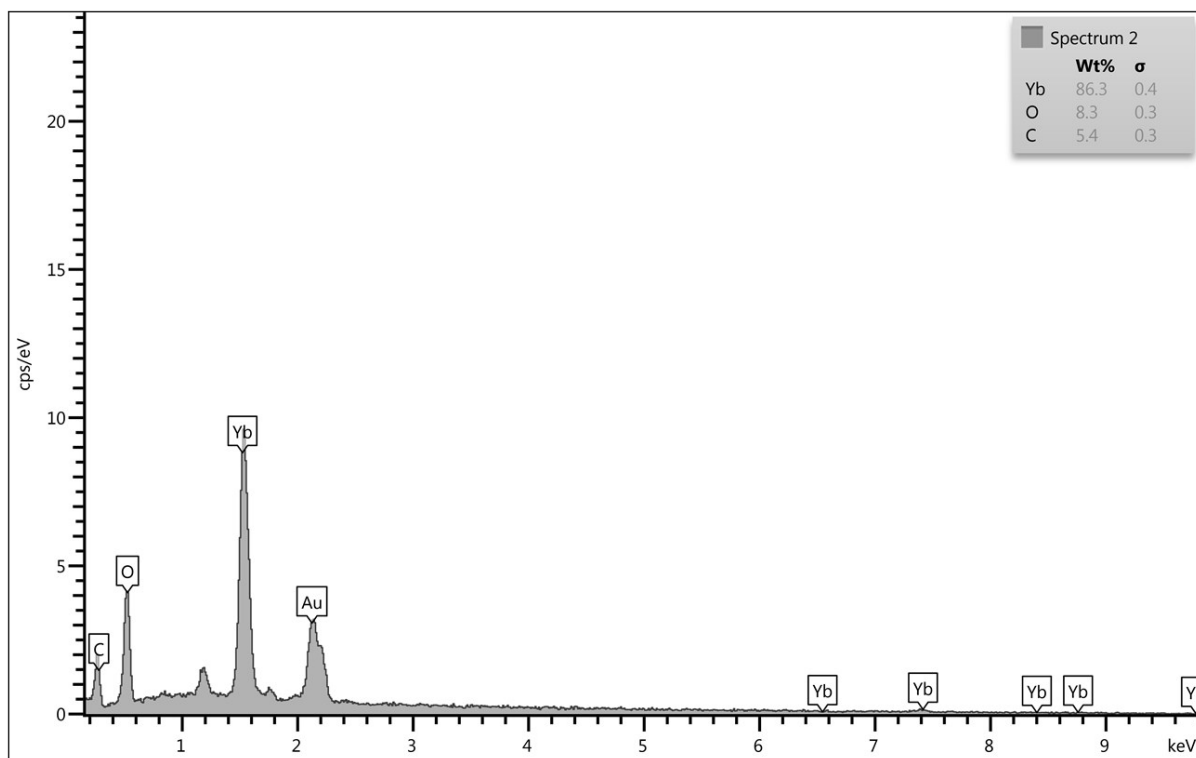

Fig. S3 EDX analysis of YbRGO1.

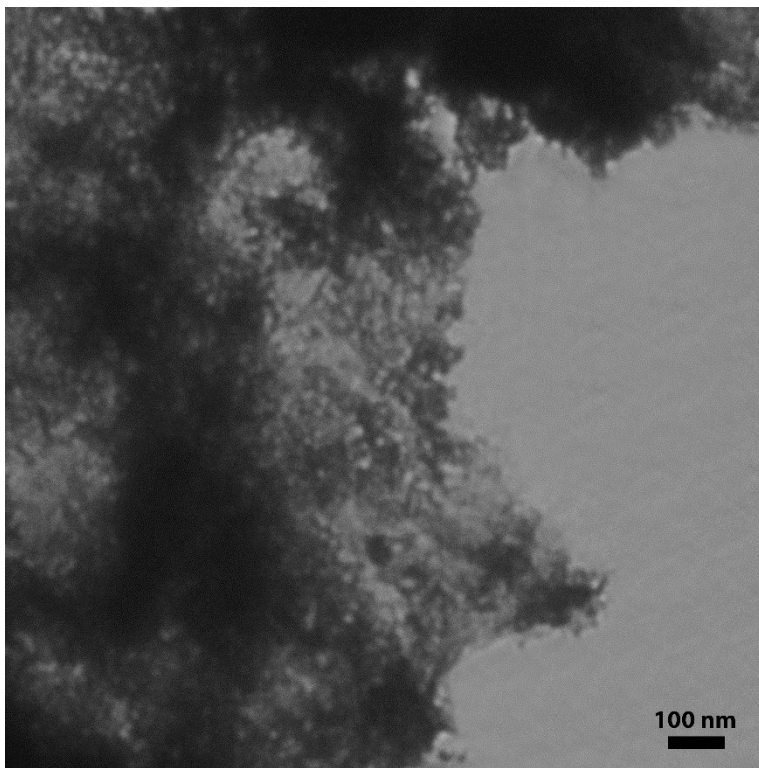

Fig. S4 TEM image of YbRGO1.

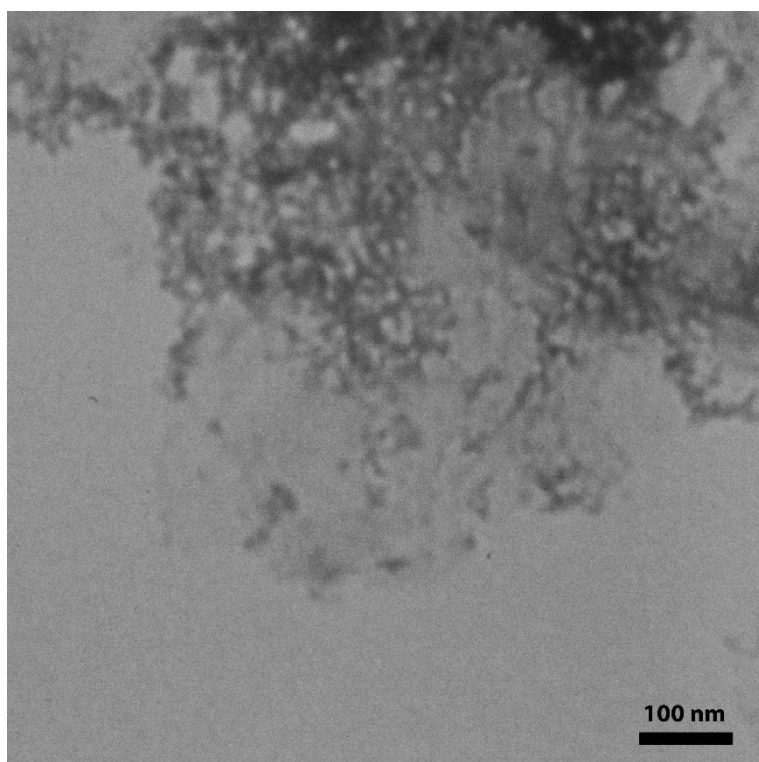

Fig. S5 TEM image of YbRGO2.

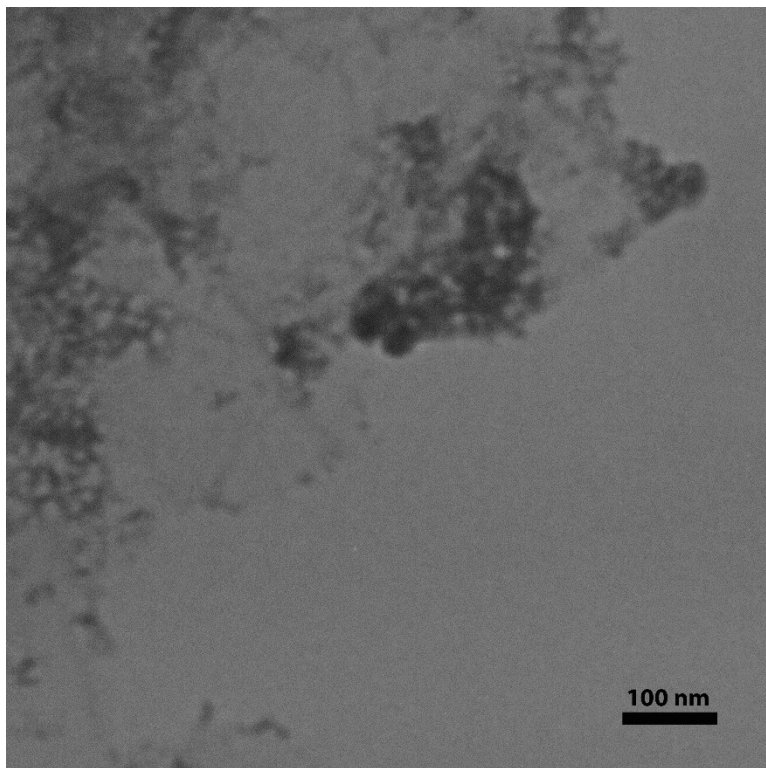

Fig. S6 TEM image of YbRG03.
